# Supplementary material for: Striatal action-value neurons reconsidered
Source: eLife journal article supplement (doi:10.7554/elife.34248), 2018-05-31

# A

## basal ganglia

### action-values from basal ganglia sessions

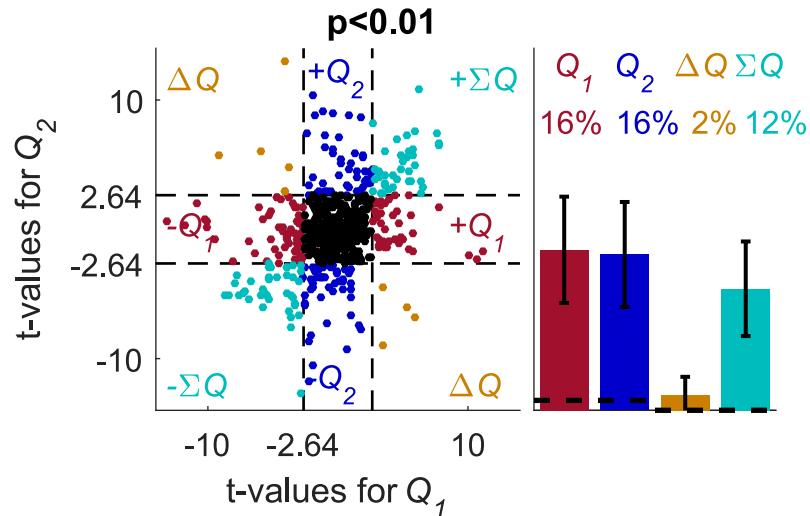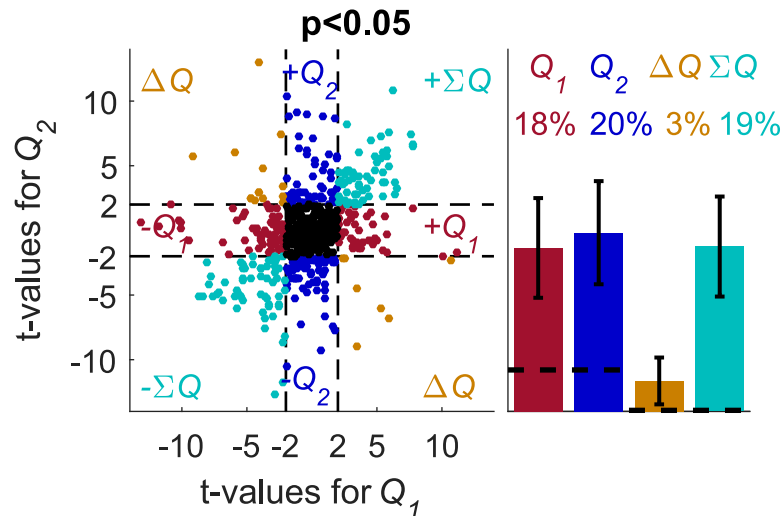

# B

## random-walk

### action-values from basal ganglia sessions

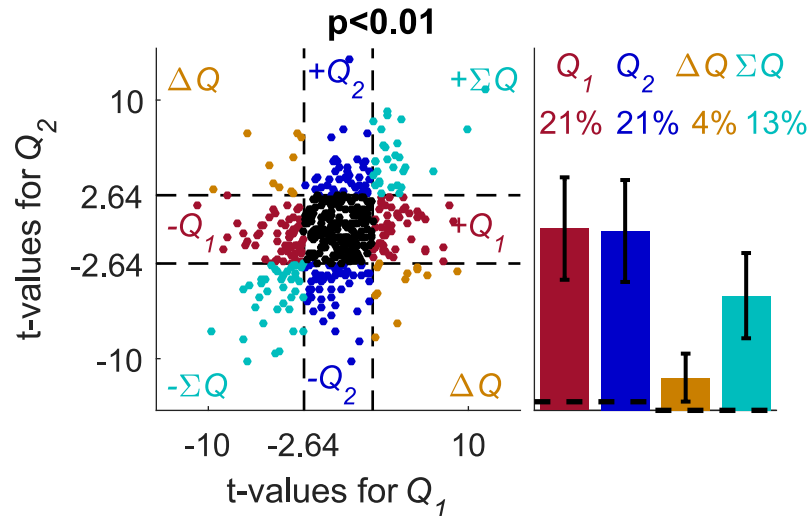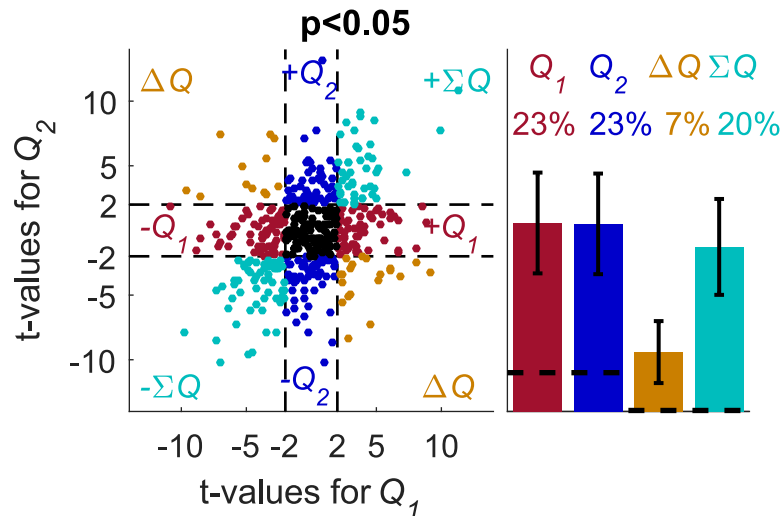

Supplement: supp [file elife-34248-supp-v1.zip]
