# Supplementary figures and images for: Striatal action-value neurons reconsidered
Source: eLife journal article supplement (doi:10.7554/elife.34248), 2018-05-31

**A****random walk**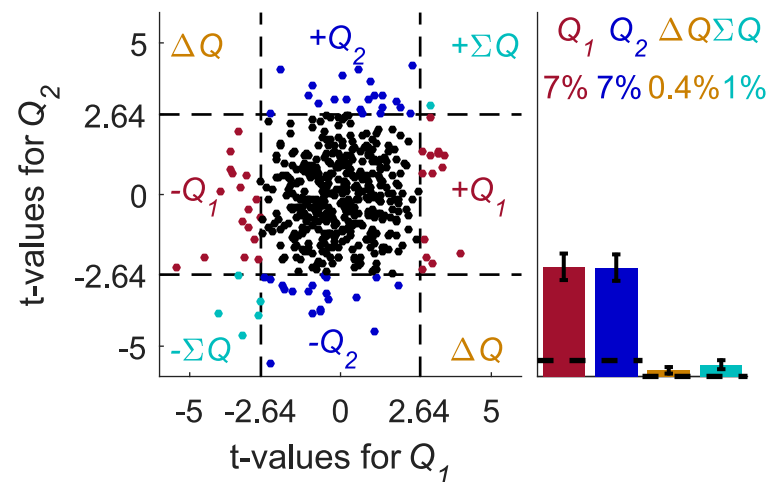**B****motor cortex**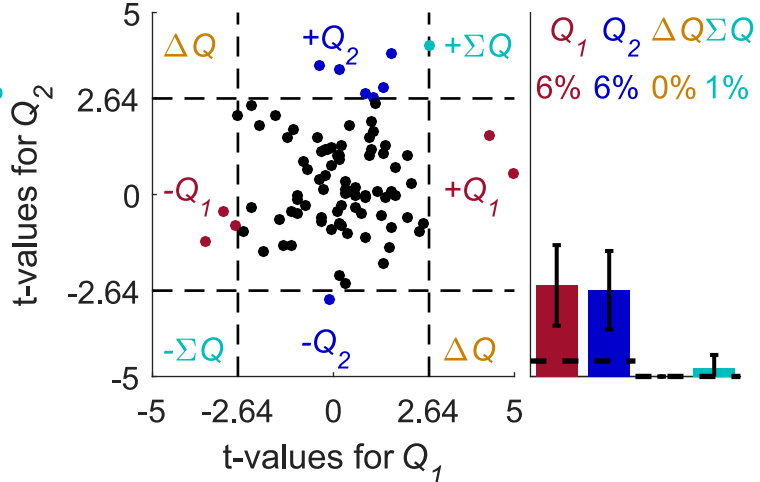**C****auditory cortex**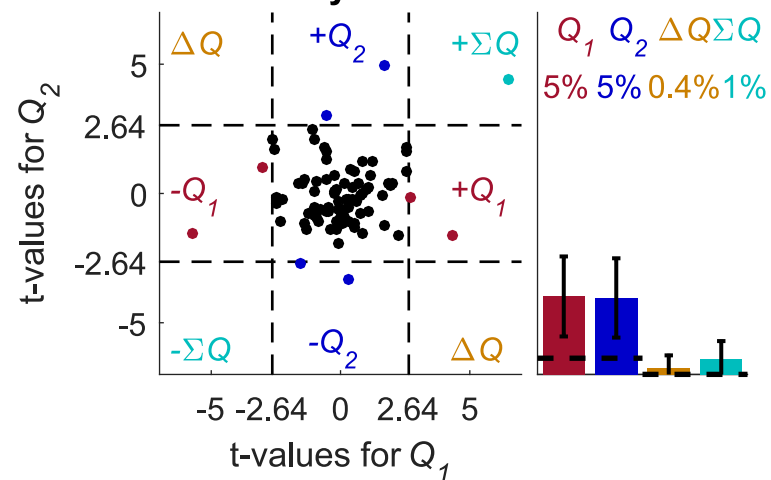**D****basal ganglia**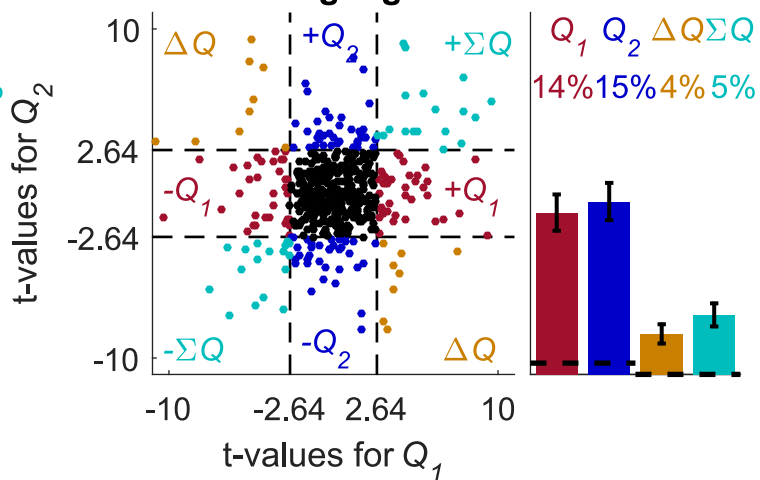

Supplement: supp [file elife-34248-supp-v1.zip]

**A****random walk**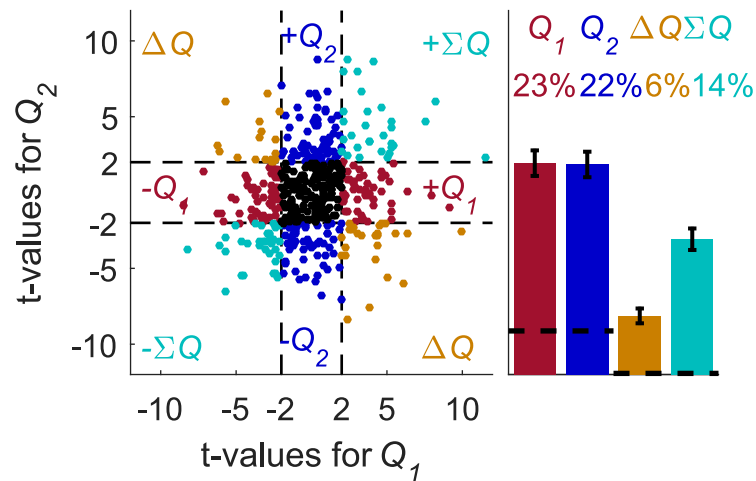**B****motor cortex**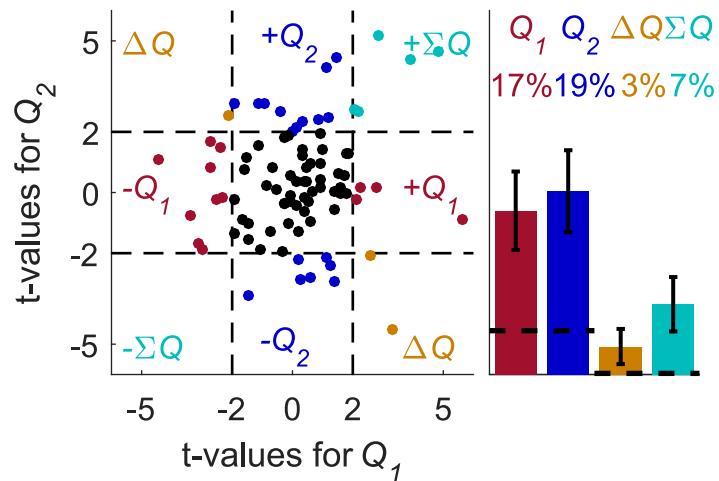**C****auditory cortex**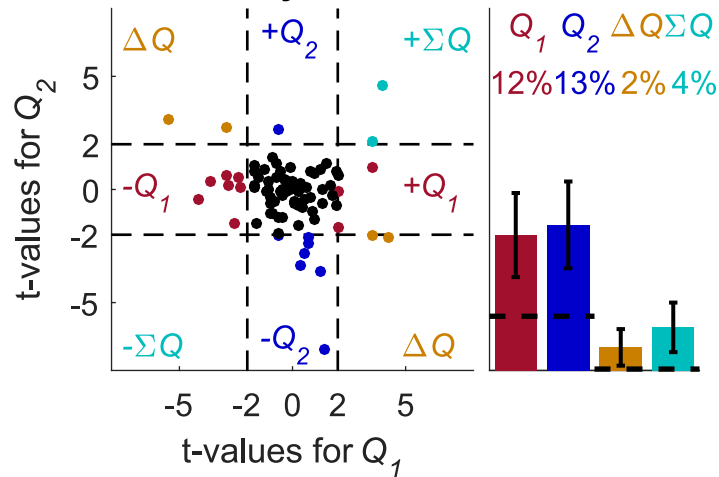

Supplement: supp [file elife-34248-supp-v1.zip]

**A**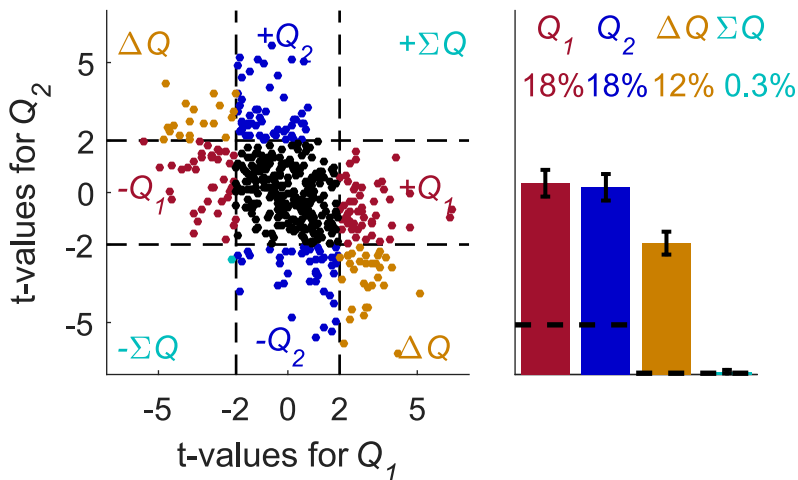**B**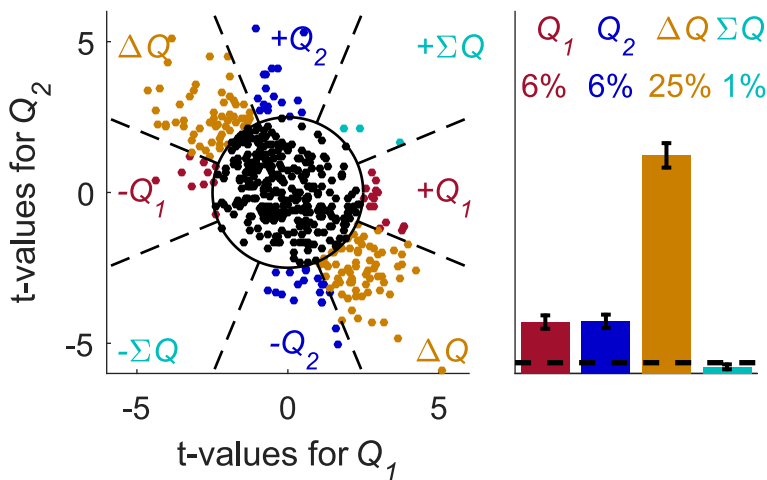

Supplement: supp [file elife-34248-supp-v1.zip]

**A****random walk**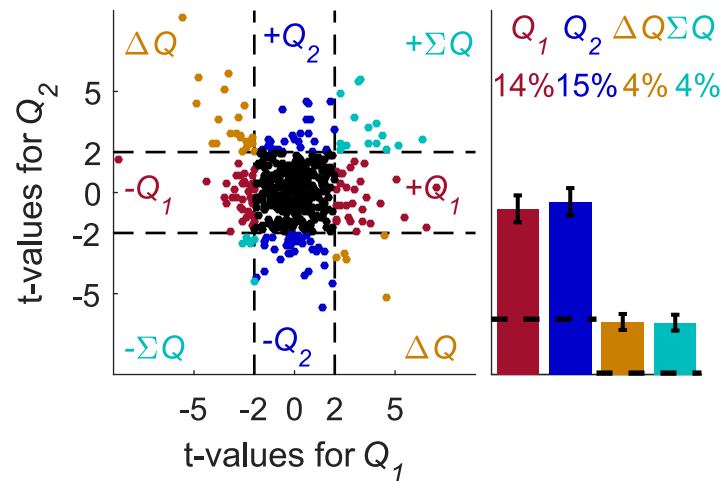**B****motor cortex**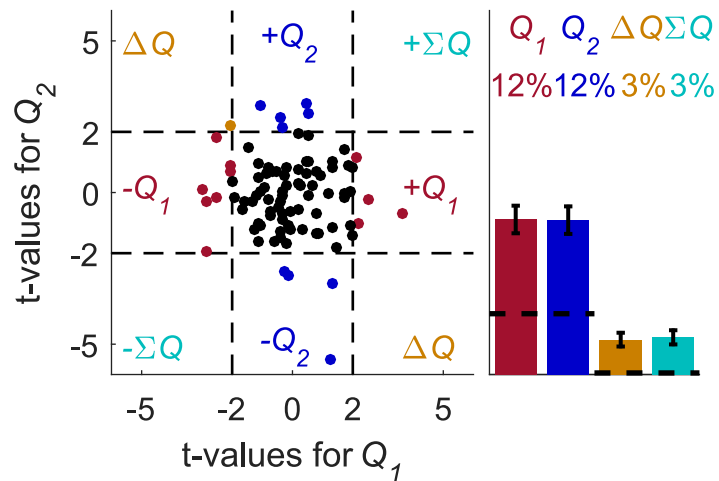**C****auditory cortex**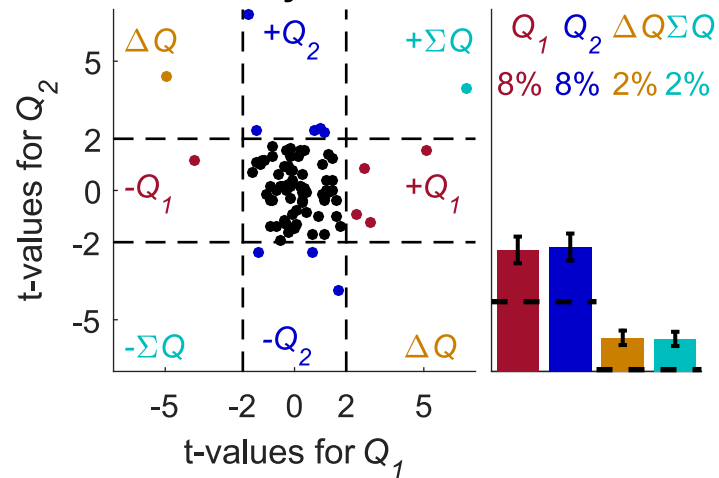**D****basal ganglia**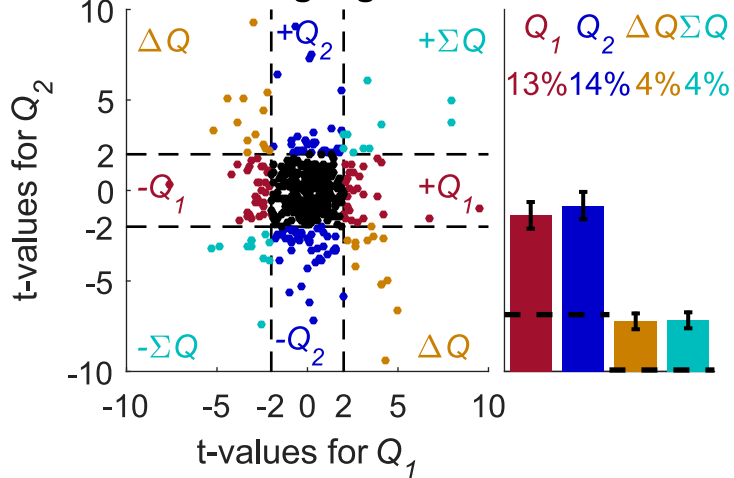

Supplement: supp [file elife-34248-supp-v1.zip]

**A****random walk**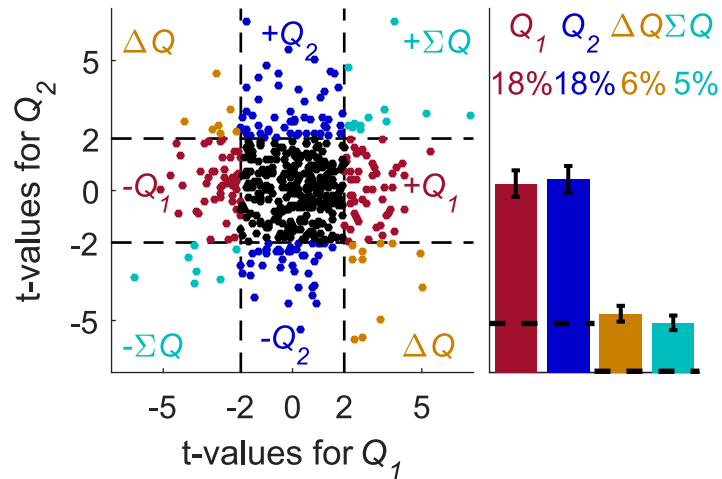**B****motor cortex**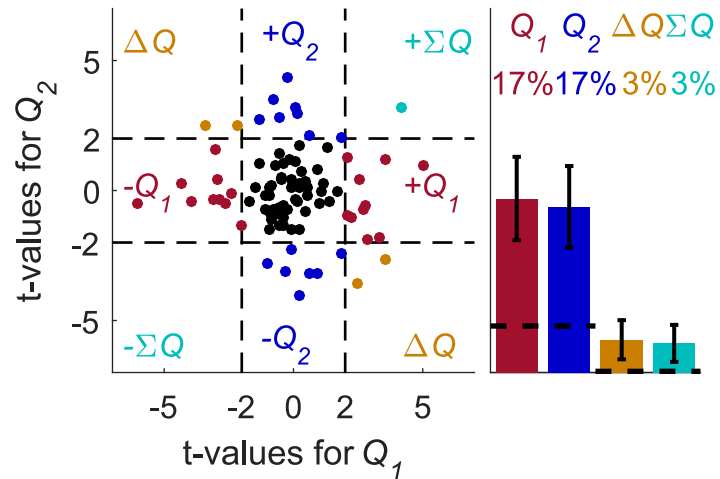**C****auditory cortex**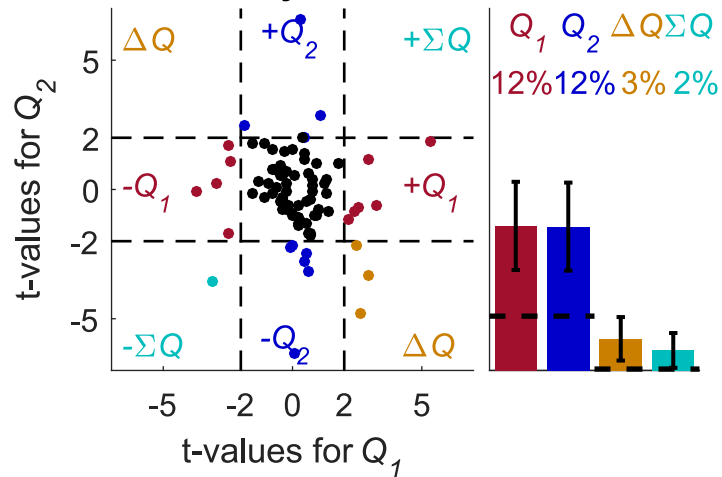**D****basal ganglia**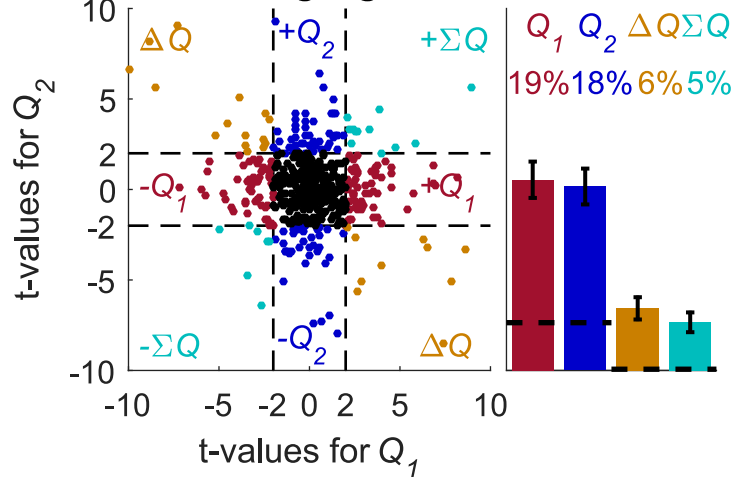

Supplement: supp [file elife-34248-supp-v1.zip]

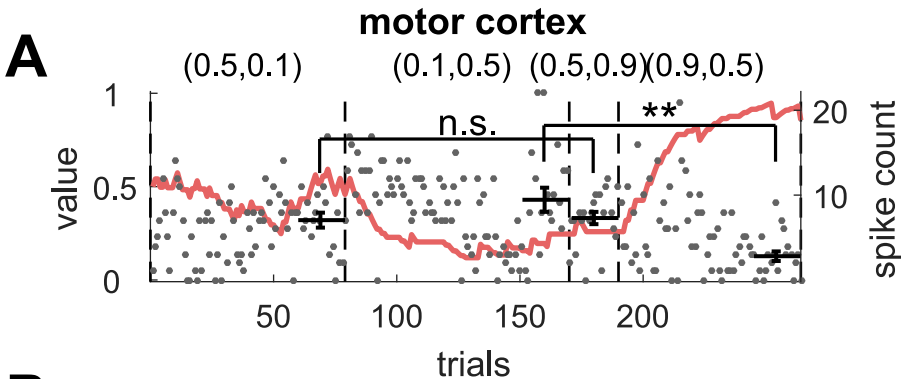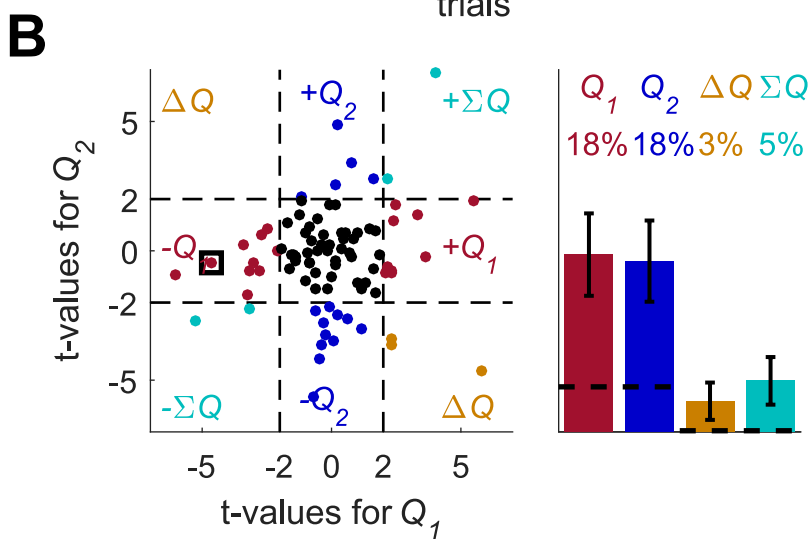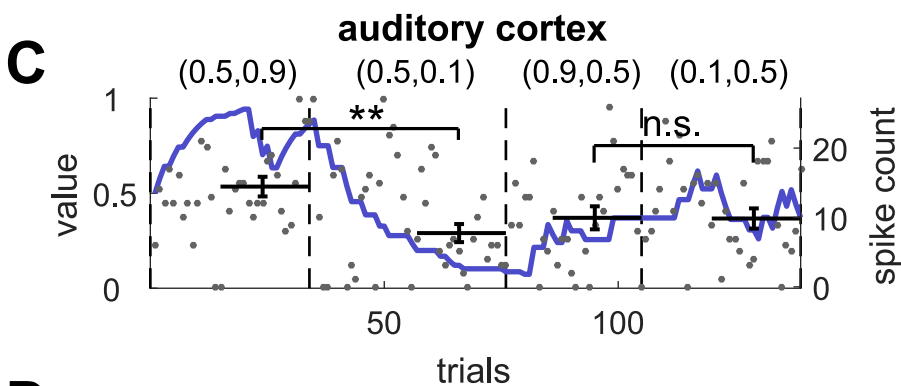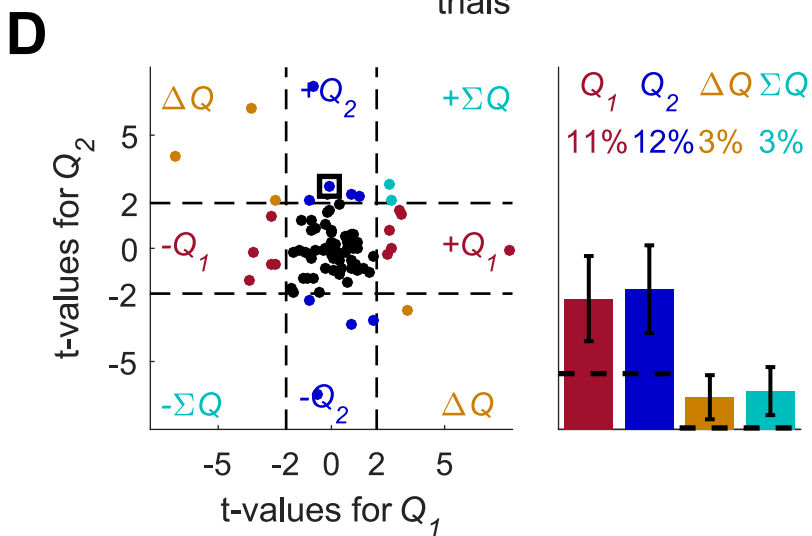

Supplement: supp [file elife-34248-supp-v1.zip]

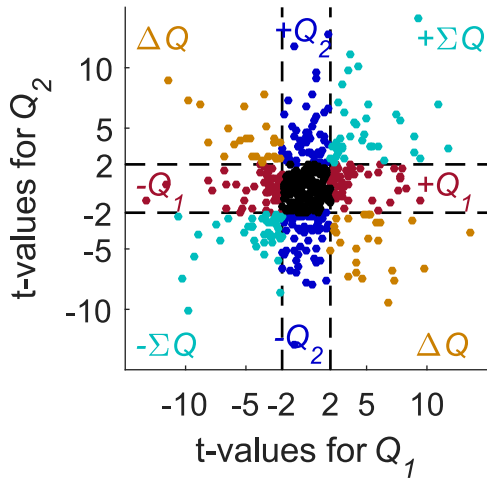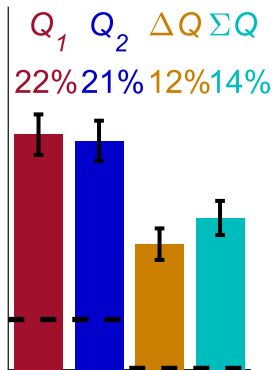

Supplement: supp [file elife-34248-supp-v1.zip]

**A****random walk**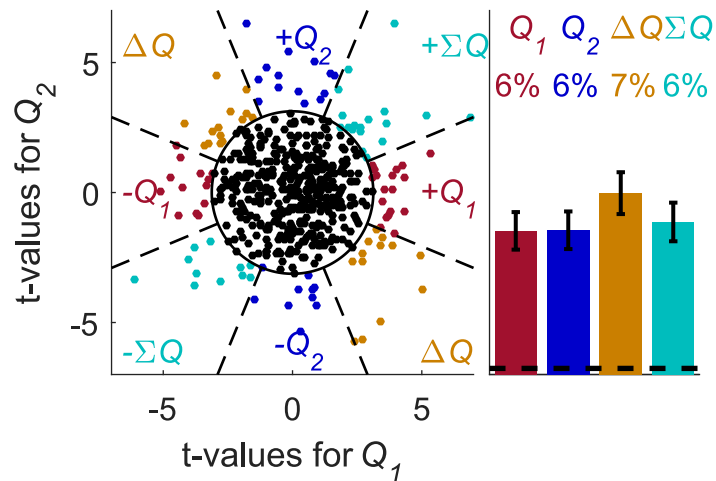**B****motor cortex**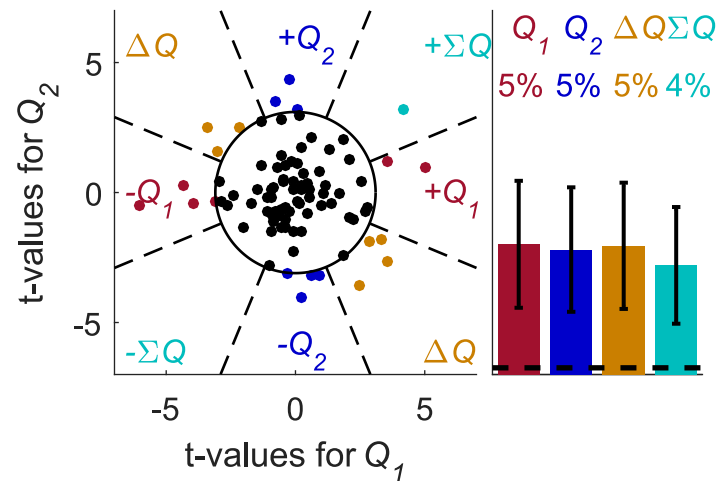**C****auditory cortex**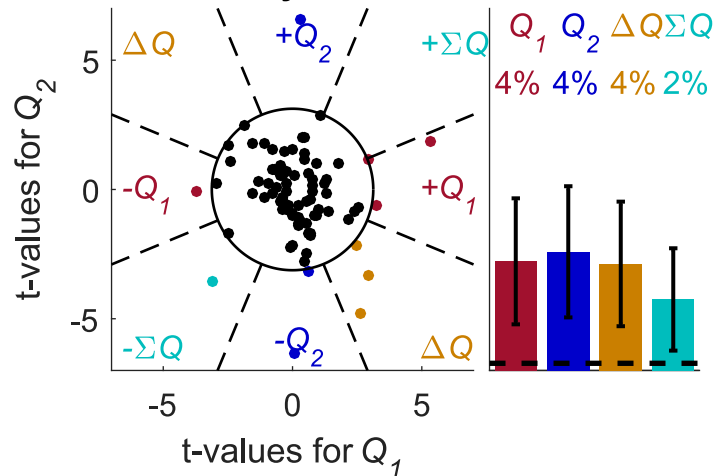**D****basal ganglia**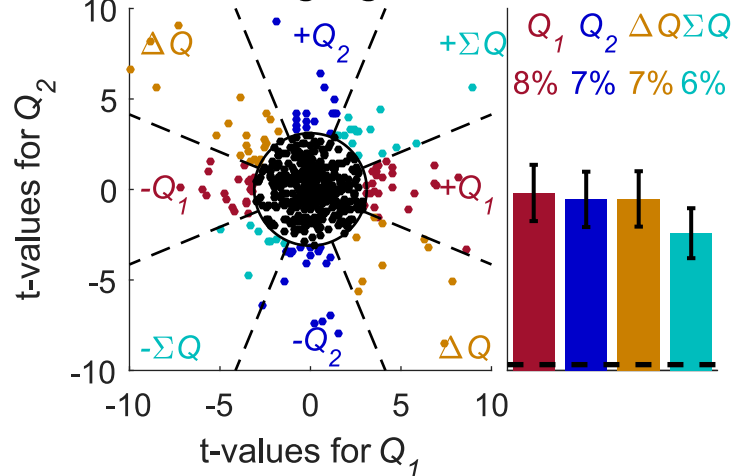

Supplement: supp [file elife-34248-supp-v1.zip]

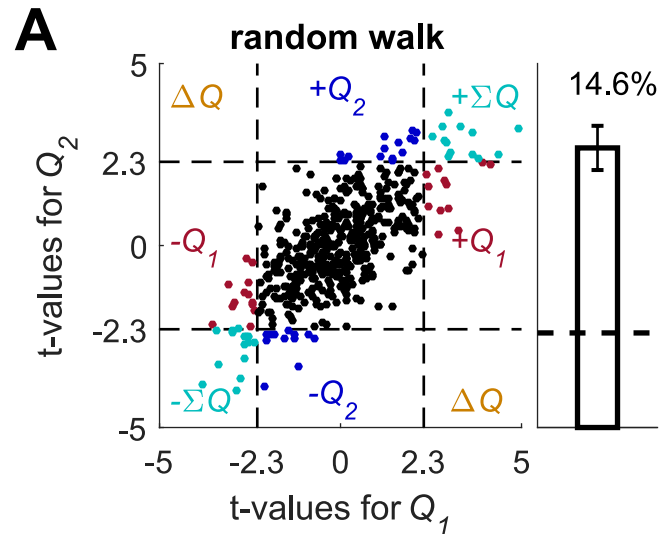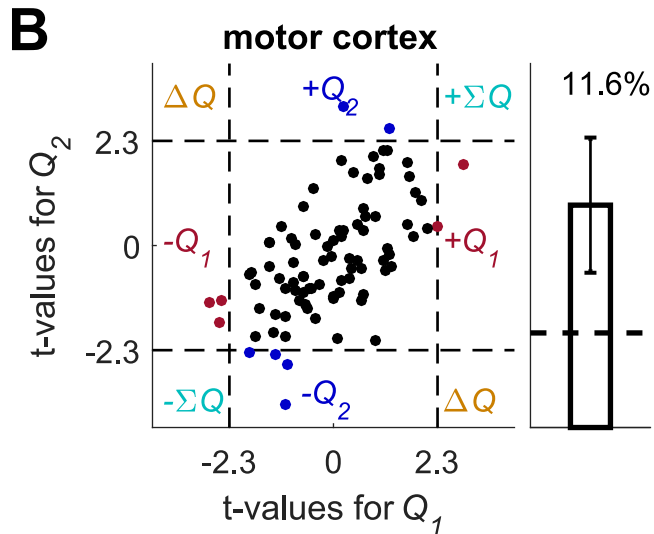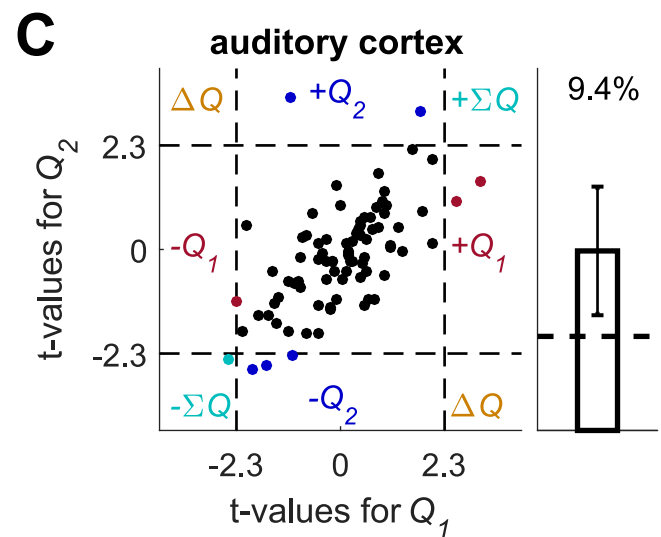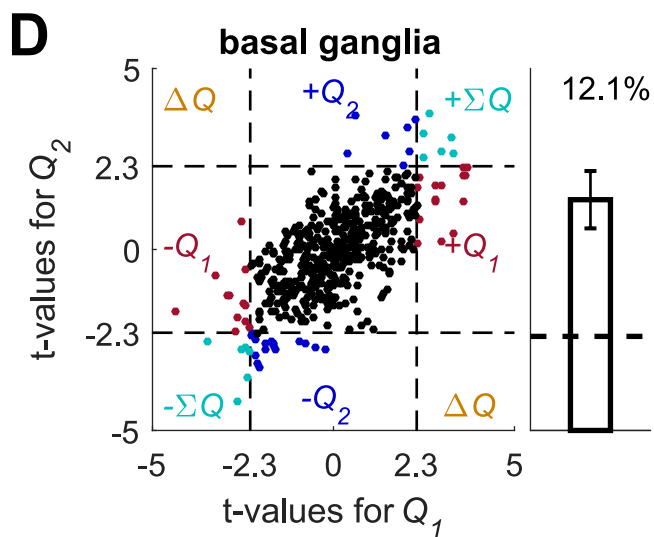

Supplement: supp [file elife-34248-supp-v1.zip]
